1 **MAVS polymers smaller than 80 nm induce mitochondrial membrane**  
2 **remodeling and interferon signaling**

3 Ming-Shih Hwang<sup>1</sup>, Jérôme Boulanger<sup>2</sup>, Jonathan Howe<sup>2</sup>, Anna Albecka<sup>1</sup>, Mathias Pasche<sup>2</sup>,  
4 Leila Mureşan<sup>3,4</sup> & Yorgo Modis<sup>1</sup>

5 *<sup>1</sup>Department of Medicine, University of Cambridge, MRC Laboratory of Molecular Biology,*  
6 *Francis Crick Avenue, Cambridge, CB2 0QH, United Kingdom*

7 *<sup>2</sup>MRC Laboratory of Molecular Biology, Francis Crick Avenue, Cambridge, CB2 0QH, United*  
8 *Kingdom*

9 *<sup>3</sup>Cambridge Advanced Imaging Centre, University of Cambridge, Cambridge CB2 1QP,*  
10 *United Kingdom*

11 *<sup>4</sup>Department of Physiology, Development and Neuroscience, University of Cambridge,*  
12 *Cambridge CB2 1QP, United Kingdom*

13 *Correspondence: Yorgo Modis, ymodis@mrc-lmb.cam.ac.uk*

14

15 **Running title:** MAVS signaling complexes are smaller than 80 nm

16

17 **Keywords:** innate immunity, pathogen-associated molecular pattern (PAMP), signal  
18 transduction, STORM, cell death

19

## 1 **Abstract**

2 Double-stranded RNA (dsRNA) is a potent proinflammatory signature of viral infection.  
3 Oligomerization of RIG-I-like receptors on cytosolic dsRNA nucleates self-assembly of the  
4 mitochondrial antiviral signaling protein (MAVS). In the current signaling model, the caspase  
5 recruitment domains of MAVS form helical fibrils that self-propagate like prions to promote  
6 signaling complex assembly. However, there is no conclusive evidence that MAVS forms  
7 fibrils in cells or with the transmembrane anchor present. We show here with super-resolution  
8 light microscopy that MAVS activation by dsRNA induces mitochondrial membrane  
9 remodeling. Quantitative image analysis at imaging resolutions as high as 32 nm shows that in  
10 the cellular context MAVS signaling complexes and the fibrils within them are smaller than 80  
11 nm. The transmembrane domain of MAVS is required for its membrane remodeling, interferon  
12 signaling and proapoptotic activities. We conclude that membrane tethering of MAVS restrains  
13 its polymerization and contributes to mitochondrial remodeling and apoptosis upon dsRNA  
14 sensing.

## 15 **Introduction**

16 Recognition of viral nucleic acids by innate immune receptors is one of the most conserved  
17 and important mechanisms for sensing viral infection. Many viruses deliver or generate double-  
18 stranded RNA (dsRNA) in the cytosol of the host cell. Cytosolic dsRNA is a potent  
19 proinflammatory signal in vertebrates. Endogenous dsRNAs are modified or masked through  
20 various mechanisms to prevent autoimmune signaling, and genetic deficiencies in these dsRNA  
21 modification pathways can cause autoimmune disorders [1-3]. Cytosolic dsRNA is primarily  
22 sensed by the RIG-I-like receptors (RLRs) RIG-I (*DDX58*), MDA5 (*IFIH1*) and LGP2  
23 (*DHX58*) [4], which activate the mitochondrial antiviral signaling protein (MAVS) [5-8]. RIG-  
24 I recognizes dsRNA blunt ends with unmethylated 5'-di- or triphosphate caps [9-12]. MDA5  
25 recognizes uninterrupted RNA duplexes longer than a few hundred base pairs [11, 13]. LGP2  
26 functions as a cofactor for MDA5 by promoting the nucleation of MDA5 signaling complexes  
27 near dsRNA blunt ends [14, 15]. Binding to dsRNA causes RIG-I to form tetramers and MDA5  
28 to cooperatively assemble into helical filaments around the dsRNA [16-19]. RIG-I and MDA5  
29 each contain two N-terminal caspase recruitment domains (CARDs). The increased proximity  
30 of the CARDs upon RLR oligomerization induces the CARDs from four to eight adjacent RLR  
31 molecules to form a helical lock-washer-like assembly [19, 20]. These helical RLR CARD  
32 oligomers bind to MAVS, which has a single N-terminal CARD, via CARD-CARD  
33 interactions [5]. Binding of MAVS CARDs to RLR CARD oligomers nucleates the

1 polymerization of MAVS CARD fibrils with amyloid-like (or prion-like) properties including  
2 resistance to detergents and proteases [19-21]. MAVS polymerization is required for signaling,  
3 and the spontaneous elongation of MAVS fibrils following nucleation is thought to provide a  
4 signal amplification mechanism [21]. MAVS fibrils then recruit proteins from the TRAF and  
5 TRIM families to form multimeric signaling platforms, or signalosomes [21]. MAVS is  
6 localized primarily on the outer mitochondrial membrane [5] but can also migrate via the  
7 mitochondria-associated membrane (MAM) to peroxisomes [22], which function as an  
8 alternative signaling platform to mitochondria [23]. MAVS signalosomes activate both type I  
9 interferon (through IRF3) and NF- $\kappa$ B-dependent inflammatory responses [11, 13, 21].  
10 Overexpression of MAVS induces apoptotic cell death, and this proapoptotic activity is  
11 dependent on its transmembrane anchor (TM) and mitochondrial localization, but independent  
12 of the CARD [24, 25]. A loss-of-function MAVS variant is associated with a subset of systemic  
13 lupus patients [26].

14 In the current model of MAVS signaling, RLR CARD oligomers trigger a change of state in  
15 the CARD of MAVS, from monomer to polymeric helical fibril. MAVS fibrils grow like  
16 amyloid fibrils by drawing in any proximal monomeric MAVS CARDS [20]. This model is  
17 based partly on the observation that purified monomeric MAVS CARD spontaneously  
18 assembles into fibrils of 0.2 – 1  $\mu$ m in length [19, 21]. The fibrils, but not the monomers,  
19 activate IRF3 in signaling assays [21] with cell-free cytosolic extracts. Moreover, a purified  
20 MAVS fragment lacking the TM can, in its polymeric fibril form, activate IRF3 in crude  
21 mitochondrial cell extracts that contain endogenous wild-type MAVS (17). However, this  
22 signaling model is based primarily on signaling assays and structural studies performed in a  
23 cell-free environment with soluble fragments of MAVS lacking the TM. MAVS has been  
24 reported to form rod-shaped puncta on the outer mitochondria membrane upon activation with  
25 Sendai virus [27], but evidence that MAVS forms polymeric fibrils in cells remains  
26 inconclusive, and furthermore MAVS fibrils are not sufficient for signaling. Indeed, the MAVS  
27 TM is required for interferon induction and cell death activation [5, 21, 25], and several viruses  
28 including hepatitis C virus suppress type I interferon production by cleaving it off [8, 28-31].  
29 The sequence between the CARD and TM of MAVS, which represents 80% of the MAVS  
30 sequence, is also required for downstream signaling [32]. How this sequence and the TM  
31 function together with the CARD in cell signaling remains unclear.

32 In the cellular context, MAVS CARD fibrils are subject to multiple physical constraints,  
33 including tethering to RLR-dsRNA complexes (at one end of the fibril) and to the

1 mitochondrial membrane (via the TM of each MAVS molecule in the fibril). Here, we address  
2 the question of how the current model of MAVS signaling can be reconciled with these physical  
3 constraints, and the requirement of the TM, for cell signaling. Imaging of MAVS signaling  
4 complexes by super-resolution light microscopy with effective optical resolutions of up to 32  
5 nm reveal that in the cellular context MAVS signaling complexes are significantly smaller than  
6 expected—no more than 80 nm. Moreover, MAVS signaling is associated with remodeling of  
7 mitochondrial compartments and apoptosis, and both of these activities are dependent on the  
8 TM of MAVS. Our data indicate that MAVS forms smaller signaling complexes than  
9 previously thought [21, 27].

## 10 **Results**

11 **MAVS activation by cytosolic RNA induces mitochondrial membrane remodeling.** The  
12 polymerization of purified soluble fragments of MAVS into helical fibrils is well documented  
13 [19, 21]. In the cellular context, however, MAVS is tethered to the outer mitochondrial  
14 membrane via its transmembrane anchor, and binds via its CARD to oligomeric or polymeric  
15 RLR-dsRNA complexes [19, 21, 33]. To examine how the physical constraints imposed by  
16 membrane tethering and association with RIG-I or MDA5 may affect MAVS CARD fibril  
17 formation, we imaged cells containing active MAVS signaling complexes by super-resolution  
18 fluorescence microscopy. Mouse embryonic fibroblasts (MEFs) and 3T3 cells were imaged by  
19 structured illumination microscopy (SIM) and stimulated emission depletion microscopy  
20 (STED). Because fluorescent proteins fused to the N-terminus, C-terminus or juxtamembrane  
21 region of MAVS were not suitable for STORM, cells were labeled with a monoclonal antibody  
22 against a linear epitope within residues 1-300 of MAVS and a fluorescently-labeled secondary  
23 antibody. An antibody with an overlapping epitope was shown previously to recognize MAVS  
24 in the fibril form in non-reducing semi-denaturing electrophoresis [21]. Immunofluorescence  
25 of MAVS and TOM20, an outer mitochondrial membrane marker, showed that the two proteins  
26 localized to the same mitochondrial compartments (Fig. 1). We observed changes in the  
27 distribution of MAVS and in overall mitochondrial morphology (using the TOM20 marker)  
28 upon infection of 3T3 cells with a West Nile virus (WNV) replicon (Fig. 1A). Infection with  
29 the WNV replicon caused mitochondrial compartments to form more fragmented and less  
30 filamentous structures closer to the nucleus. Introducing the dsRNA mimic poly(I:C) into  
31 MEFs by electroporation (0.6 – 1 picogram per cell) recapitulated the changes in MAVS  
32 distribution and mitochondrial morphology observed upon infection with the WNV replicon  
33 (Fig. 1B). These changes were also recapitulated by cotransfecting MEFs derived from MAVS

1 knockout mice (MAVS KO MEFs) [34] with poly(I:C) RNA and a plasmid encoding MAVS  
2 (0.6 – 1 pg of each per cell, Figs. 1C). Mitochondrial remodeling associated with poly(I:C)  
3 treatment was quantified as statistically significant reductions in: (1) the distance from the  
4 nucleus (from an average of 9.0  $\mu\text{m}$  to 4.5  $\mu\text{m}$ ,  $p = 2.0 \times 10^{-4}$ ) (Fig. 1E); (2) the fraction of the  
5 cytosolic area occupied by mitochondria (from an average of 24.2% to 16.7%,  $p = 0.0015$ )  
6 (Fig. 1F); and (3) the length of mitochondrial compartments measured as unbranched segments  
7 of skeletonized TOM20 fluorescence (from an average of 2.42  $\mu\text{m}$  to 1.98  $\mu\text{m}$ ,  $p = 0.0478$ )  
8 (Fig. 1G). The amount of MAVS plasmid and the electroporation method used in transfections  
9 were selected to yield MAVS expression levels that were in the physiological range (see  
10 below). Notably, no MAVS filaments longer than the resolution limit were observed. The  
11 resolution of SIM and STED was approximately 110 nm and 80 nm in the imaging ( $xy$ ) plane,  
12 respectively (and 350 and 600 nm in  $z$ , respectively). These resolutions were also sufficient to  
13 resolve differences in the positions of individual MAVS and TOM20 protein complexes so that  
14 the immunofluorescence signals from the two proteins formed an alternating pattern within  
15 mitochondrial compartments rather than strictly colocalizing (Figs. 1A, 1C, 2A). We confirmed  
16 that transfection with poly(I:C) RNA induced translocation of IRF3 to the nucleus, which is a  
17 hallmark of interferon- $\beta$  (IFN- $\beta$ ) signaling (Fig. 2B). Importantly, we showed that the level of  
18 MAVS expression in transfected MAVS KO MEFs was comparable to the physiological level  
19 of endogenous MAVS expression in wild-type MEFs (Fig. 3). A live-cell dual-luciferase  
20 reporter assay was used to confirm that IFN- $\beta$  signaling is activated in MAVS KO MEFs  
21 transfected with the MAVS expression plasmid and poly(I:C) RNA (see below). Costaining  
22 for MAVS and MDA5 (Fig. 2C) showed an increased interaction between the two proteins,  
23 defined as the average distance between MAVS and MDA5 fluorescence (Fig. 2D) [35].  
24 However, MDA5 staining remained predominantly cytosolic and no significant increase  
25 colocalization was detected with poly(I:C) treatment based on the Pearson correlation.  
26 Similarly, RIG-I was recently shown to partition into a MAVS-associated mitochondrial  
27 fraction and a cytosolic stress granule fraction [36]. In the absence of MAVS, mitochondria  
28 retained their filamentous morphology and failed to move towards the nucleus upon  
29 transfection with poly(I:C) (Figs. 1D). We note that the immunofluorescence and cell signaling  
30 data show relatively high levels of mitochondrial remodeling (Fig. 1), IRF3 nuclear  
31 translocation (Fig. 2B) and background signaling (see below) in cells transfected with a control  
32 plasmid instead of poly(I:C), which is likely attributable to IFN- $\beta$  signal transduction by  
33 cytosolic DNA sensors. We conclude that activation of MAVS by cytosolic RNA sensing is  
34 associated with remodeling of mitochondria into more globular and perinuclear compartments.  
35 Mitochondrial remodeling from the healthy filamentous morphology to perinuclear globular

1 compartments through mitochondrial fission events is a hallmark of apoptosis [37]. Indeed,  
 2 MAVS was shown previously to promote apoptosis independently of its function in initiating  
 3 interferon and NF- $\kappa$ B signaling [24].

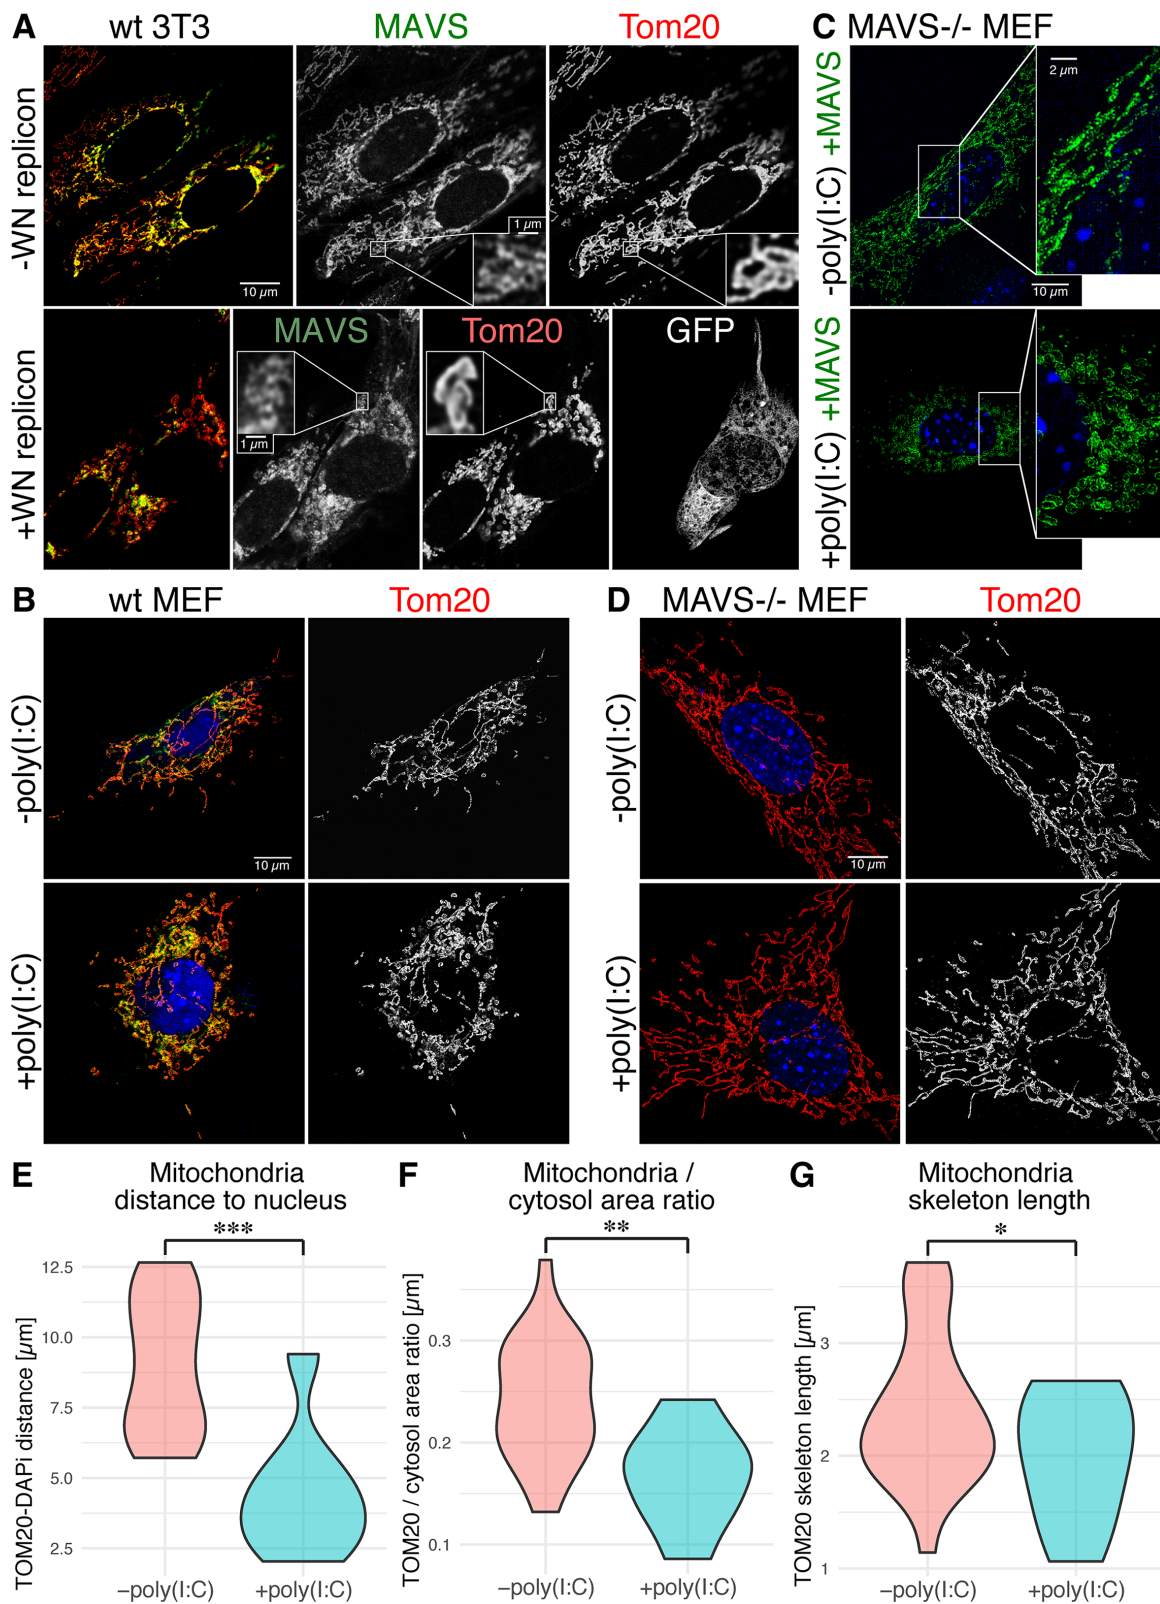

4  
 5 **Fig. 1.** Super-resolution and confocal fluorescence microscopy of MAVS signaling complexes  
 6 on the outer mitochondrial membrane upon activation with poly(I:C) RNA or a West Nile

1 reporter virus. **(A)** Stimulated emission depletion microscopy (STED) of MAVS and TOM20  
2 in NIH 3T3 cells infected with a GFP-labeled West Nile reporter virus (WN replicon), with  
3 immunofluorescently labeled MAVS in green and TOM20 immunofluorescence in red, or with  
4 the MAVS staining, TOM20 staining or the GFP infection marker shown separately in grey.  
5 Yellow results from green-red overlap and is indicative of MAVS-TOM20 colocalization. **(B)**  
6 Confocal images of MAVS and TOM20 in wild-type MEFs, with MAVS (green) and TOM20  
7 (red) immunofluorescence, or with TOM20 staining shown separately in grey. Cells were  
8 transfected with either poly(I:C) RNA (+poly(I:C)) or an empty plasmid (-poly(I:C)) to control  
9 for the effects of transfection. **(C)** Structured illumination microscopy (SIM) of MAVS  
10 immunofluorescence (green) in MAVS KO MEFs cotransfected with MAVS and poly(I:C)  
11 RNA (+poly(I:C)), or MAVS and a control plasmid (-poly(I:C)). **(D)** Confocal images of  
12 TOM20 in MAVS KO MEFs transfected with either poly(I:C) RNA (+poly(I:C)) or an empty  
13 plasmid (-poly(I:C)) but no plasmid encoding MAVS, with immunolabeling of MAVS (green)  
14 and TOM20 (red), or with TOM20 staining shown separately in grey. DAPI nuclear staining  
15 is shown in blue (panels **B-D**). **(E)** Average distance of TOM20 fluorescence from the nucleus,  
16 defined as DAPI fluorescence. **(F)** Quantification of the fraction of the cytosolic area occupied  
17 by TOM20 fluorescence, from bright field immunofluorescence imaging (100x magnification)  
18 of 39 cells (28 -poly(I:C), 11 +poly(I:C)). **(G)** Average length of mitochondrial compartments  
19 measured as the length of unbranched segments of skeletonized TOM20 fluorescence, from the  
20 same images used in **(F)**.

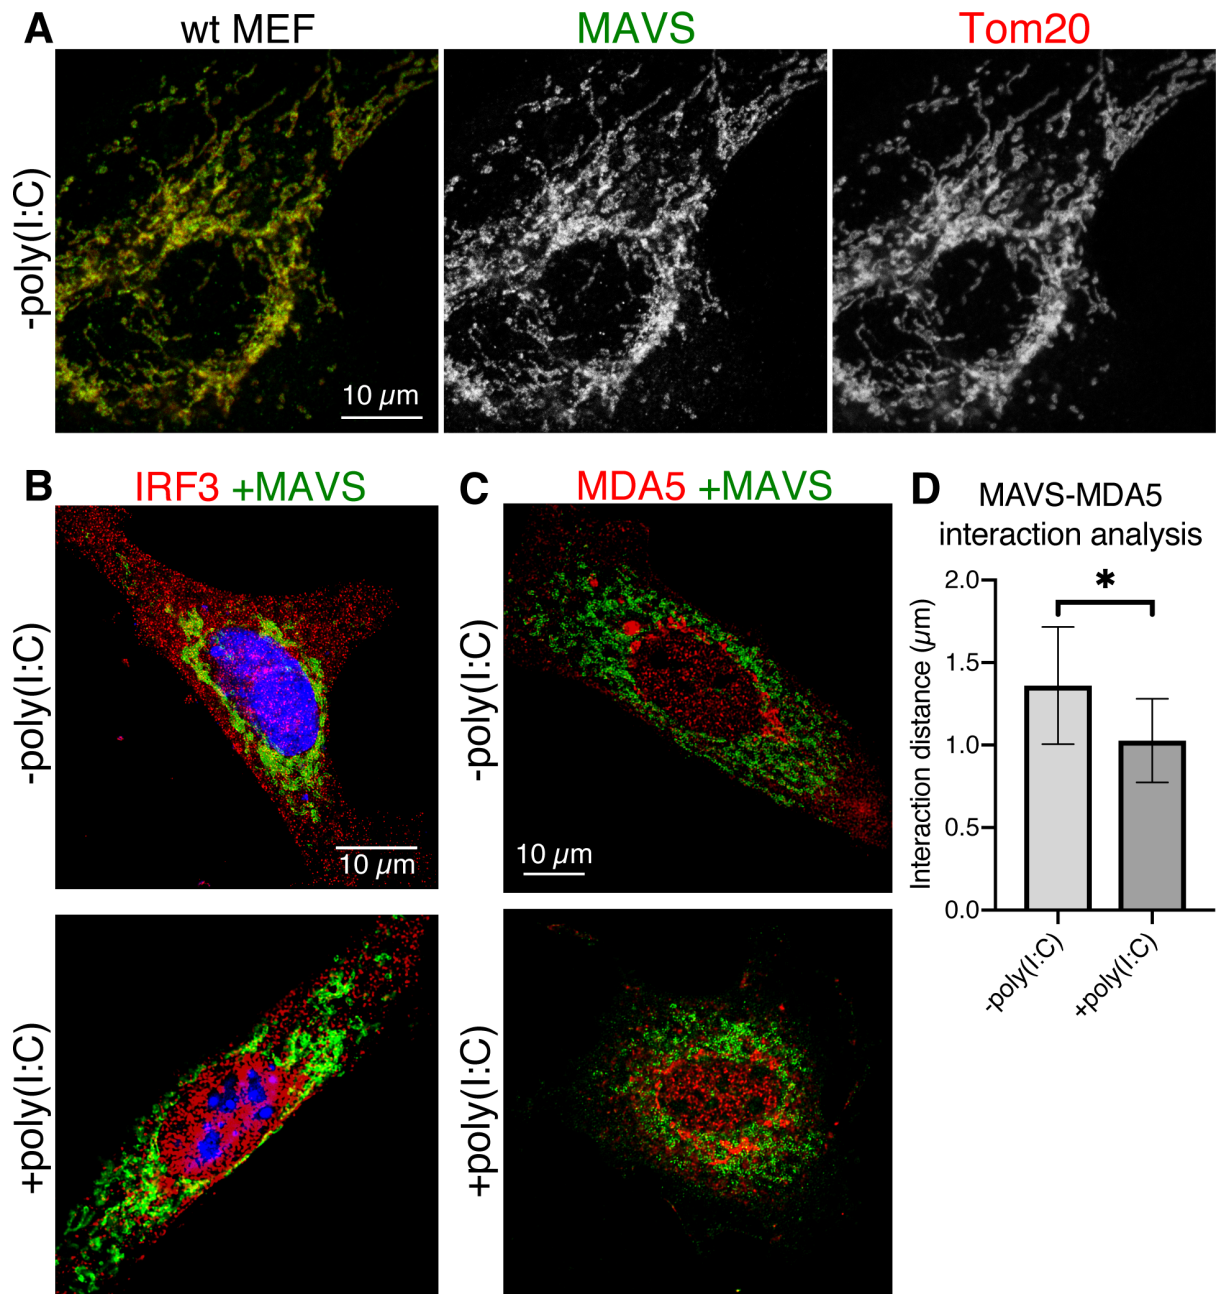

1  
2 **Fig. 2.** Immunofluorescence microscopy showing mitochondrial morphology and cellular  
3 localization of IRF3 and MDA5 upon MAVS activation with poly(I:C) RNA. (A) Baseline  
4 mitochondrial morphology of wild-type MEFs without any transfection of plasmid DNA or  
5 poly(I:C) RNA. Immunolabeled MAVS and TOM20 are in green and red, respectively (left),  
6 and separately in grey (center and right). (B) Nuclear translocation of IRF3 on MAVS  
7 activation with poly(I:C) RNA. Representative image of MAVS KO MEFs cotransfected with  
8 either wild-type MAVS and a control plasmid (-poly(I:C)) or with wild-type MAVS and  
9 poly(I:C) RNA (+poly(I:C)). MAVS and IRF3 immunofluorescence signals are green and red,  
10 respectively. DAPI nuclear staining is blue. (C) Representative image of MAVS KO MEFs  
11 transfected either with wild-type MAVS and a control plasmid (-poly(I:C)) or with wild-type



1 MAVS and poly(I:C) RNA (+poly(I:C)). MAVS and IRF3 signals are green and red,  
 2 respectively. (D) Interaction analysis of MAVS and MDA5 fluorescence. The average distance  
 3 between MDA5 and MAVS points was 32% smaller in cells transfected with MAVS (1.03  $\mu$ m)  
 4 versus cells transfected with control plasmid DNA (1.36  $\mu$ m). Error bars represent the standard  
 5 deviation from the mean; n = 4. Statistical significance (p = 0.019) was calculated in Prism 8  
 6 with a 1-sided t-test.

**A** Proportion of MAVS-expressing cells

|                  | Number of cells |          |          |
|------------------|-----------------|----------|----------|
|                  | Poly(I:C)       | Positive | Negative |
| Endogenous MAVS  | +               | 1316     | 36       |
| Endogenous MAVS  | -               | 1425     | 330      |
| Transfected MAVS | +               | 313      | 292      |
| Transfected MAVS | -               | 869      | 756      |

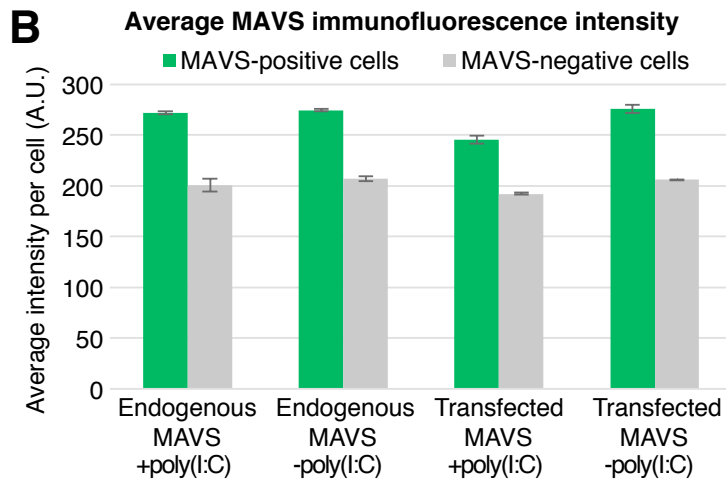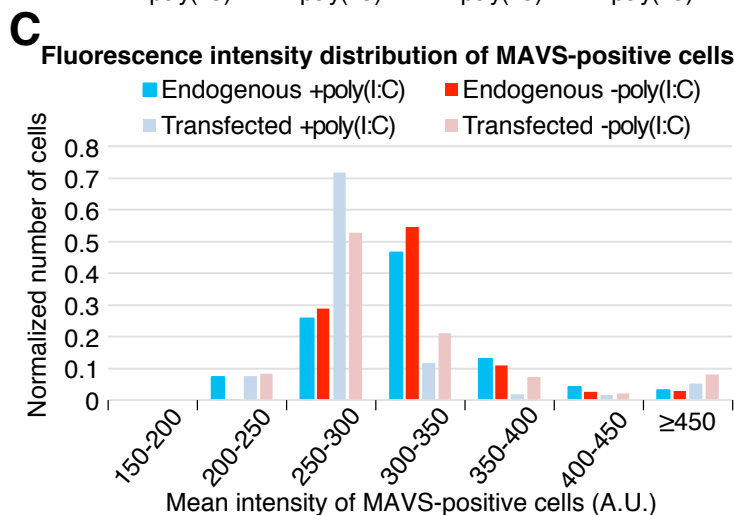

7 **Fig. 3.** Comparison of MAVS  
 8 immunofluorescence in wild-  
 9 type MEFs and MAVS KO  
 10 MEFs transfected with  
 11 MAVS. (A) Numbers of  
 12 MEFs expressing MAVS  
 13 (positive) and lacking MAVS  
 14 expression (negative) after  
 15 (co)transfection with  
 16 poly(I:C) (+poly(I:C)) or a  
 17 control plasmid (-poly(I:C)).  
 18 MAVS immunofluorescence  
 19 was quantified with the  
 20 General Analysis tool in  
 21 Nikon Elements. A threshold  
 22 of 215 arbitrary fluorescence  
 23 intensity units (A.U.) was  
 24 used as the cutoff for MAVS-  
 25 positive cells. The  
 26 transfection efficiency was  
 27 approximately 50%. (B)  
 28 Average MAVS  
 29 immunofluorescence  
 30 intensity of endogenous and  
 31 transfected MAVS in MEFs  
 32 (co)transfected with

33 poly(I:C) (+poly(I:C)) or a control plasmid (-poly(I:C)). (C) The population distribution of the  
 34 mean immunofluorescence intensity of MAVS-positive cells, plotted as the normalized number  
 35 of cells versus fluorescence intensity from 150 to 450 A.U. in 50-A.U. bins.

1 **STORM shows MAVS signaling complexes are smaller than expected.** Purified monomeric  
2 MAVS CARD spontaneously forms fibrils 0.2 – 1  $\mu\text{m}$  in length [19, 21]. The fibrils, but not  
3 the monomers, activate IRF3 in cell-free assays [21]. However, SIM and STED imaging of  
4 cells with actively signaling MAVS did not resolve any clearly apparent fibrils (Fig. 1). To  
5 determine whether MAVS forms fibrils too small to resolve by SIM or STED, we employed a  
6 higher-resolution imaging modality, stochastic optical reconstruction microscopy (STORM),  
7 to image cells containing active MAVS signaling complexes. STORM can yield effective  
8 resolutions of 20 nm in the imaging plane [38]. MEFs were immunolabeled with an antibody  
9 against MAVS and a secondary antibody conjugated to Alexa Fluor 647, which was selected  
10 for its stable and prolonged signal in the STORM blinking buffer. MAVS KO MEFs were  
11 cotransfected with MAVS and poly(I:C) RNA as described for SIM and STED imaging. No  
12 MAVS filaments longer than the resolution limit were observed in the STORM images (Fig.  
13 4). Instead, most of the MAVS immunofluorescence was present in fluorescent foci with  
14 irregular shapes, varying in diameter from 30 nm to 80 nm. These dimensions coincide with  
15 the effective resolution of the STORM imaging (see below). Unexpectedly, despite the global  
16 change in mitochondrial morphology associated with poly(I:C) treatment, there was no  
17 significant difference in the shapes and size range of MAVS foci in cells transfected with  
18 poly(I:C) or with a control plasmid.

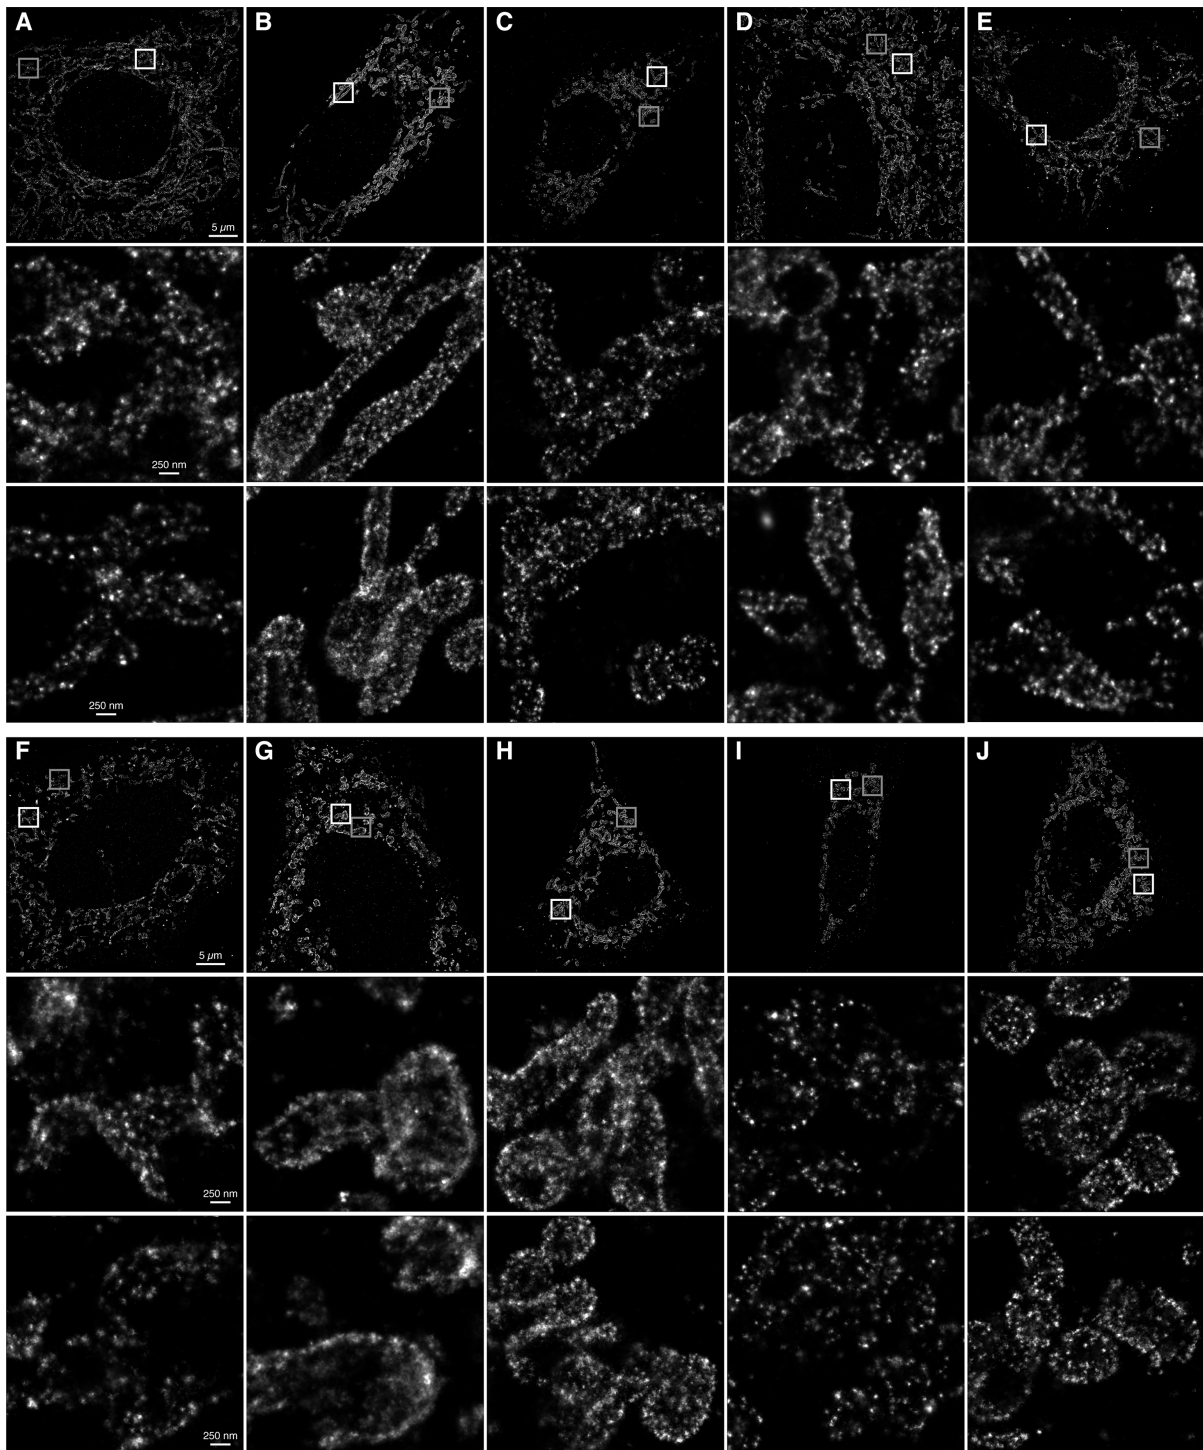

1 **K**  200 x 79 nm      **L**  ← 200 x 8.5 nm

2 **Fig. 4.** Stochastic optical reconstruction microscopy (STORM) of MAVS signaling complexes.

3 (A-E) Five representative MAVS KO MEF cells transfected with MAVS and stained with an

4 anti-MAVS antibody conjugated to Alexa Fluor 647. The boxed regions are shown enlarged in

5 the lower panels of each overview panel (white box, middle panel; grey box, lower panel). (F-

6 J) Five representative MAVS KO MEF cells cotransfected with MAVS and poly(I:C) RNA.

7 The boxed regions are shown enlarged in the lower panels of each overview panel (white box,

1 middle panel; grey box, lower panel). (K) Simulated renderings of immunofluorescence from  
2 MAVS fibrils with different antibody labeling efficiencies. An atomic model of a 200 nm  
3 MAVS CARD fibril was generated with one primary antibody and two secondary antibodies  
4 bound to each MAVS protomer (see Methods). The atoms of the lysine residues of each  
5 secondary antibody (the sites of fluorophore conjugation) were rendered with the same  
6 localization uncertainty as in the STORM images above. To emulate different antibody labeling  
7 efficiencies, the simulated immunolabeled fibrils were rendered with a given observation  
8 probability for each atom of 20%, 40%, 60%, 80% or 100% (from left to right in the panel).  
9 (L) A 200 nm MAVS CARD fibril rendered for reference on the same scale as the filaments in  
10 (J), without secondary antibodies and without blurring from localization uncertainty.

11 **Quantitative image analysis indicates MAVS fibrils are shorter than 80 nm.** Since our  
12 ability to visualize submicrometer MAVS fibrils is critically dependent on the effective  
13 resolution of the imaging experiment, an accurate measurement of the imaging resolution is  
14 necessary to determine the minimum fibril length that can be resolved. We measured the  
15 resolution of our STORM images with the Fourier Ring Correlation (FRC) method, using an  
16 FRC of 0.143 as the threshold to measure resolution [39]. This criterion is the widely accepted  
17 standard for resolution assessment in cryo-electron microscopy (cryoEM) [40-42]. FRC curves  
18 calculated from our STORM images indicate that the resolution in the imaging plane ranged  
19 from 32 to 66 nm (Fig. 5A, B). Moreover, there was a correlation between the measured  
20 resolution of the images and the visual appearance of the MAVS foci. More specifically,  
21 images with the lowest resolutions (Fig. 4G, A) had more diffuse density, whereas images with  
22 the highest resolutions (Fig. 4E, I, C) had more pronounced foci, regardless of poly(I:C)  
23 treatment. This suggests that the appearance of clearly visible foci is determined by the imaging  
24 resolution rather than by the size of the imaged object. The calculated FRC resolution of the  
25 lowest-resolution STORM image was 66 nm. This is consistent with the SIM and STED data  
26 (Fig. 1A, C), which showed no correlation between poly(I:C) treatment and the appearance of  
27 clearly distinguishable MAVS fluorescence foci.

28 To quantify any subtle effects that poly(I:C) treatment might have on the clustering of MAVS  
29 foci, we performed cluster analysis on the STORM images using the pair correlation function.  
30 A hierarchical cluster model of two nested clusters was necessary to obtain a good fit to the  
31 pair correlation curve (Fig. 5C, D) [43, 44]. The clustering analysis showed that the two cluster  
32 size parameters of the nested cluster model were not significantly different in poly(I:C)-treated

1 and control samples (Fig. 5E), confirming the lack of correlation between poly(I:C) treatment  
 2 and the size of MAVS fluorescent foci.

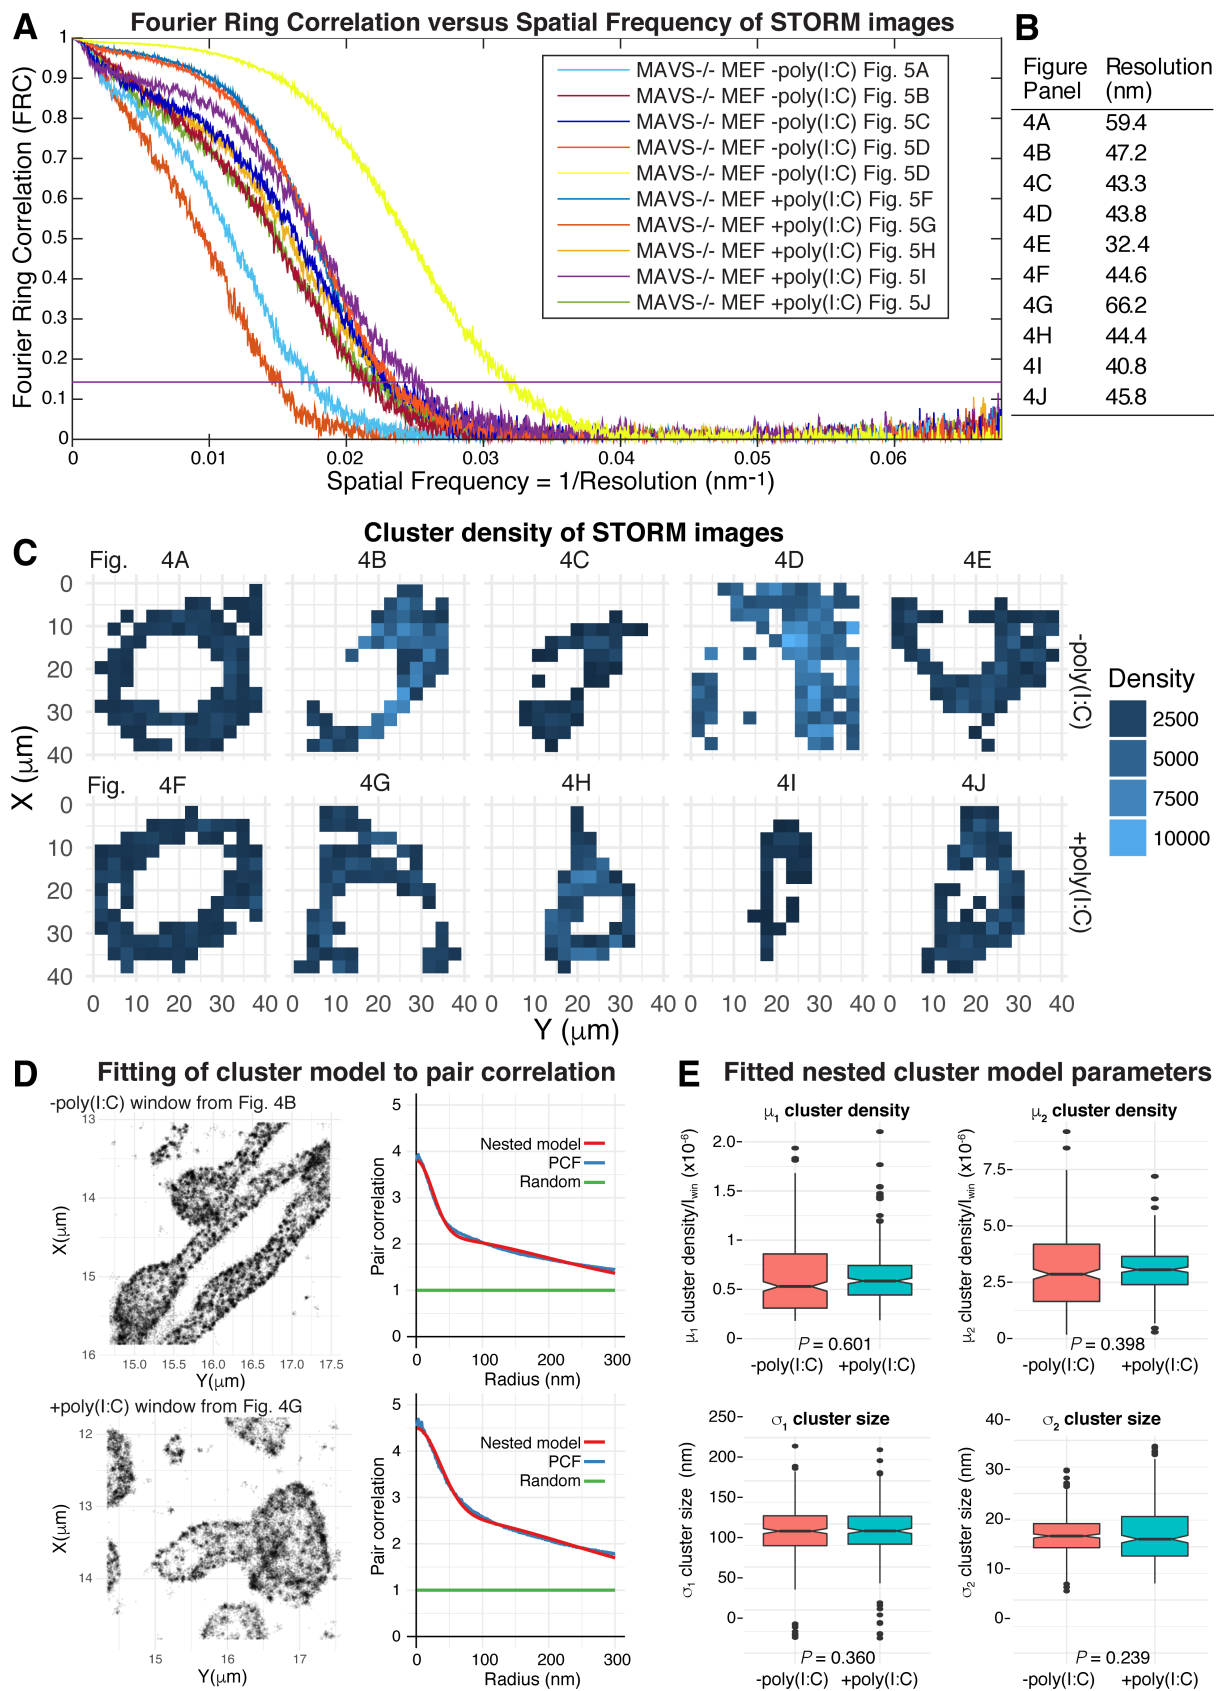

3  
 4 **Fig. 5.** Resolution assessment and cluster analysis of STORM images. (A) Fourier Ring

1 Correlation (FRC) curves were calculated for each STORM image shown in Fig. 4 (see  
2 Methods). An FRC value of 0.143, indicated by a horizontal purple line, was used as the  
3 threshold to measure resolution. **(B)** Effective resolution of each STORM image calculated  
4 from the FRC curves (FRC = 0.143). Cluster analysis of MAVS immunofluorescence in the  
5 STORM images. **(C)** Each image was divided into tiled 3 x 3  $\mu\text{m}$  windows covering the field  
6 of view. Windows with a mean fluorescence intensity greater than half the mean intensity of  
7 the whole image were selected for analysis (shaded in blue). **(D)** A nested two-cluster model  
8 (red curve) fitted to the pair correlation function (PCF, blue curve), shown for representative  
9 individual cluster analysis windows from images of poly(I:C)-treated and control samples. **(E)**  
10 Box plots of the four parameters fitted in the cluster analysis,  $\mu_1$ ,  $\sigma_1$ ,  $\mu_2$ ,  $\sigma_2$ , as defined in the  
11 Materials and Methods. The cluster density parameters,  $\mu_1$  and  $\mu_2$ , were normalized against the  
12 mean intensity of the cluster analysis window,  $I_{\text{win}}$ .

13 Reconstruction of fine structural features by super-resolution microscopy depends on the  
14 precision with which the position of each fluorophore can be localized, and on the density and  
15 spatial distribution of active fluorophores along the labeled sample [39]. In the case of  
16 immunolabeled samples, the primary and secondary antibodies increase the spacing between  
17 the molecule of interest and the fluorophore significantly (by 20 – 35 nm) [45]. To determine  
18 whether 200 nm MAVS fibrils would in principle be visible in STORM images with the  
19 localization precision, labeling strategy and fluorophore properties inherent to our study, we  
20 generated an atomic model of 200 nm MAVS CARD fibrils bound to primary and secondary  
21 antibodies, and simulated the appearance of the fibrils with the same localization precision as  
22 our STORM images at different labeling efficiencies (Fig. 4K, L). Immunolabeling increases  
23 the overall diameter of the fibrils from 8.5 nm to 79 nm, but fibrils were nevertheless clearly  
24 visible with labeling efficiencies greater than 40%. Notably, the diameter of immunolabeled  
25 MAVS CARD fibrils is similar to the lowest resolution measured for the STORM images (79  
26 vs. 66 nm, respectively). Therefore, immunolabeled MAVS fibrils shorter than 80 nm in axial  
27 length would be expected to appear as globular foci in STORM. Hence the absence of visible  
28 fibrils in our images remains consistent with the presence of helical MAVS fibrils up to 70 –  
29 80 nm. A MAVS CARD helical assembly of this length would contain 136 – 156 MAVS  
30 molecules based on the 5.13 Å axial rise per protomer [19]. By comparison, purified MAVS  
31 fragments form filaments 200 – 1,000 nm in length in solution [19, 21].

32 **MAVS TM is required for mitochondrial remodeling and IFN- $\beta$  signaling.** MAVS CARD  
33 fibrils are sufficient to activate IRF3 in cytosolic extracts, but the transmembrane domain (TM)

1 of MAVS is absolutely required for MAVS to activate IRF3 and induce interferon [5, 21]. We  
2 have shown that MAVS signaling activation causes changes in overall mitochondrial  
3 morphology similar to those associated with apoptosis, consistent with the documented  
4 proapoptotic activity of MAVS, which is dependent on the TM but not the CARD of MAVS  
5 [24]. To determine whether the MAVS TM is required for MAVS-dependent mitochondrial  
6 remodeling we used STED microscopy to image MAVS KO MEFs transfected with a plasmid  
7 encoding MAVS with the TM deleted (MAVS- $\Delta$ TM). As reported previously [5], we found  
8 that MAVS- $\Delta$ TM had diffuse cytosolic staining (Fig. 6A). Notably, cells expressing MAVS-  
9  $\Delta$ TM showed no visible aggregation, and little or no mitochondrial remodeling upon induction  
10 with poly(I:C), consistent with a recent report that the TM is required for the formation of high  
11 molecular weight MAVS aggregates [46].

12 Previous studies have measured MAVS signaling activity from cytosolic or mitochondrial cell  
13 extracts. We confirmed that MAVS KO MEFs transfected with wild-type MAVS and poly(I:C)  
14 following the same protocol used for super-resolution imaging induced IFN- $\beta$  signaling in the  
15 dual-luciferase reporter assay (Fig. 6B). In contrast, cells expressing MAVS- $\Delta$ TM failed to  
16 activate IFN- $\beta$  signaling. The signal-to-noise ratio was low in the assay, however, due at least  
17 in part to induction of IFN- $\beta$  signaling by cytosolic DNA sensing pathways such as cGAS-  
18 STING [47] in response to the transfected plasmid DNA. We therefore performed the luciferase  
19 reporter assay in STING KO MEFs (Fig. 6B), which are defective for cGAS-dependent DNA  
20 sensing [48]. The signal-to-noise was higher with STING KO MEFs than with MAVS KO  
21 MEFs despite the presence of endogenous MAVS in the STING KO MEFs. A slight but  
22 statistically insignificant increase in signaling was observed in STING KO MEFs transfected  
23 with MAVS- $\Delta$ TM. This is consistent with previous work showing that purified recombinant  
24 MAVS- $\Delta$ TM can, in its aggregated form, induce aggregation of endogenous wild-type MAVS  
25 and IRF3 activation in cell extracts enriched for mitochondria [21].

26 **MAVS induces cell death in response to cytosolic RNA.** An early hallmark of apoptosis is  
27 the depolarization of the inner mitochondrial membrane [49], which is followed at later stages  
28 of cell death by loss of nuclear DNA content due to DNA fragmentation [50]. Overexpression  
29 of MAVS in HEK293T cells was shown previously to induce apoptosis [24]. To determine  
30 whether MAVS KO MEFs expressing physiological levels of MAVS induced apoptosis in  
31 response to activation with cytosolic dsRNA, we conducted cell death assays on cells  
32 transfected with MAVS and poly(I:C) RNA following the same protocol as for super-resolution  
33 imaging. Inner mitochondrial membrane depolarization and loss of nuclear DNA content were

1 measured with the fluorescent markers 3,3'-dihexyloxacarbocyanine iodide (DiOC6) (Fig. 6C)  
 2 and propidium iodide (PI) (Fig. 6D), respectively. We found poly(I:C) treatment induced a loss  
 3 of mitochondrial membrane potential in one third of cells transfected with wild-type MAVS,  
 4 and loss of nuclear DNA content indicative of cell death in 21% of cells, at 16 h post-  
 5 transfection, the same time point used for super-resolution imaging (Fig. 6C, D). In contrast  
 6 poly(I:C) treatment of cells transfected with MAVS- $\Delta$ TM induced a loss of mitochondrial  
 7 membrane potential and DNA content in only 13% and 8% of cells, respectively.

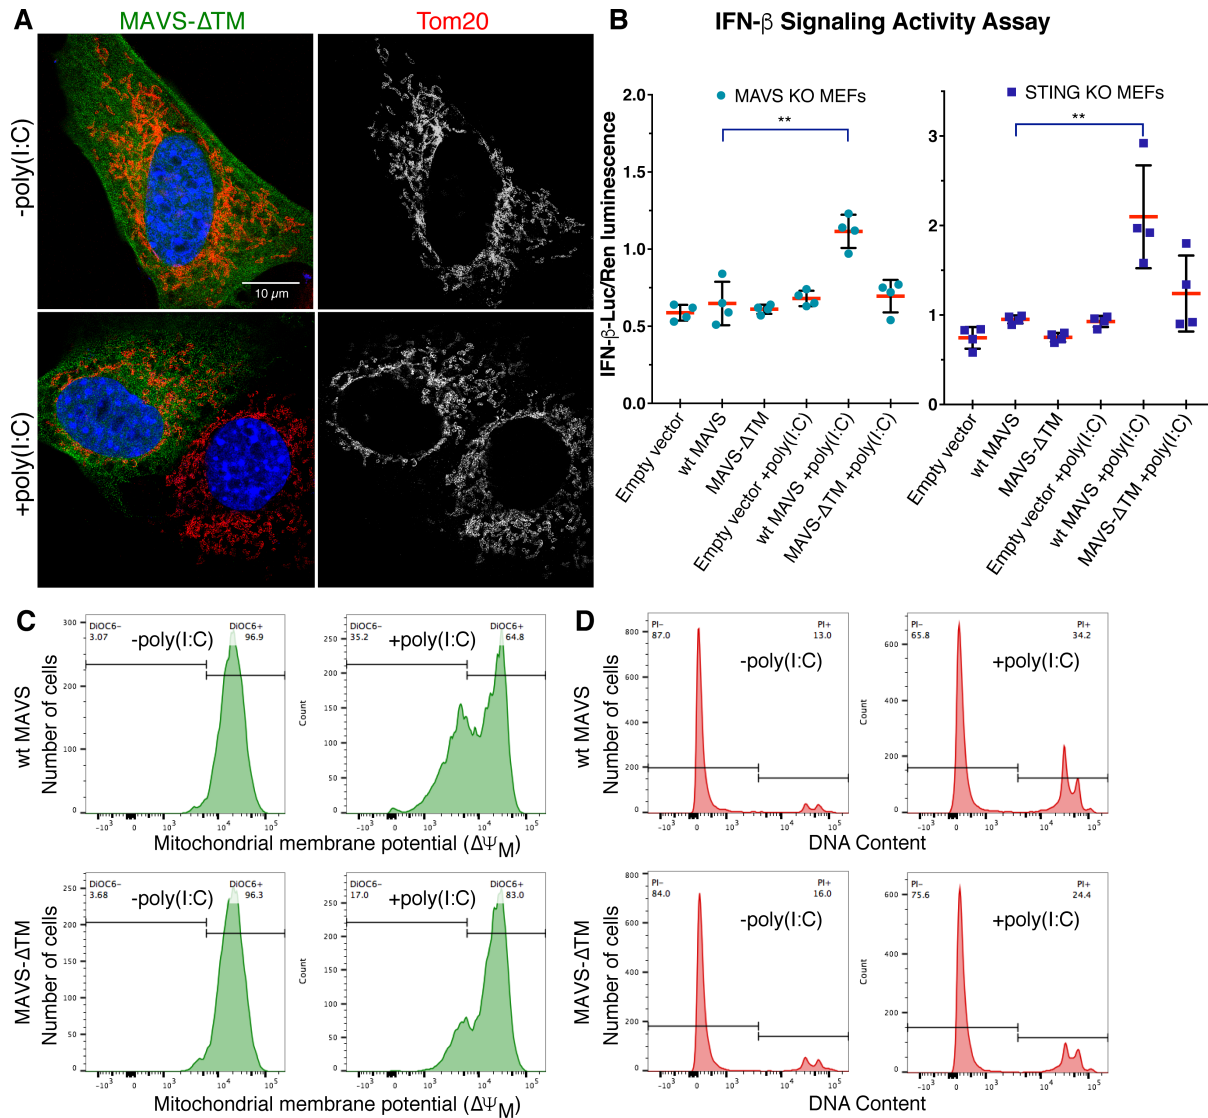

8  
 9 **Fig. 6.** The MAVS transmembrane domain is required for mitochondrial remodeling, signaling  
 10 and cell death activities of MAVS. (A) STED of MAVS- $\Delta$ TM and TOM20 in MAVS KO  
 11 MEFs transfected with either MAVS- $\Delta$ TM and poly(I:C) RNA (+poly(I:C)) or with MAVS-  
 12  $\Delta$ TM and a control plasmid (-poly(I:C)), with immunolabeling of MAVS- $\Delta$ TM (green),  
 13 TOM20 (red) and DAPI staining (blue), or with TOM20 staining shown separately in grey.  
 14 Only one of the two cells in the poly(I:C)-treated panel is positive for MAVS- $\Delta$ TM. (B) IFN-  
 15  $\beta$  dual-luciferase reporter assays in MAVS KO MEFs (left) and STING KO MEFs (right) co-



1 transfected with plasmids encoding MAVS, poly(I:C) or control DNA, firefly luciferase under  
2 an IFN- $\beta$ -inducible promoter and *Renilla* luciferase under a constitutive promoter. Relative  
3 luciferase activity was calculated as the ratio of firefly luciferase luminescence to *Renilla*  
4 luciferase luminescence. Error bars represent the standard deviation from the mean; n = 4. (C)  
5 Flow cytometry of DiOC6-stained MAVS KO MEFs cotransfected with wild-type MAVS or  
6 MAVS- $\Delta$ TM and poly(I:C) or a control plasmid. 35% of cells transfected with poly(I:C) and  
7 wild-type MAVS had a loss of inner mitochondrial membrane potential 16 h post-transfection,  
8 versus 17% of cells transfected with poly(I:C) and MAVS- $\Delta$ TM, and 3-4% of cells transfected  
9 with a control plasmid instead of poly(I:C). (D) Flow cytometry of PI-stained MAVS KO  
10 MEFs cotransfected with wild-type MAVS or MAVS- $\Delta$ TM and poly(I:C) or a control plasmid.  
11 34% of cells transfected with poly(I:C) and wild-type MAVS had reduced nuclear DNA  
12 content 16 h post-transfection, versus 24% of cells transfected with poly(I:C) and MAVS-  
13  $\Delta$ TM, and 13-16% of cells transfected with a control plasmid instead of poly(I:C).

## 14 Discussion

15 **Implications for signal transduction by MAVS.** Taken together, our super-resolution light  
16 microscopy data suggest that in live cells, MAVS signaling complexes contain significantly  
17 smaller fibrils than those formed in vitro by soluble MAVS fragments. The absence of visible  
18 fibrils in SIM, STED and STORM images of cells expressing physiological levels of MAVS  
19 activated with various stimuli (synthetic or viral dsRNA), and a quantitative assessment of the  
20 resolution of the STORM images are all consistent with an upper limit in the range of 70 – 80  
21 nm for the longest dimension of any MAVS fibrils within the MAVS signalosome.  
22 Unexpectedly, despite the global change in mitochondrial morphology associated with  
23 poly(I:C) treatment, there were no significant differences in the shape and distribution of  
24 MAVS foci in cells transfected with poly(I:C) or with a control plasmid. Cluster analysis of  
25 STORM images revealed no significant correlation between poly(I:C) treatment and the size  
26 of the clusters. Our confocal, SIM, STED and STORM data are consistent with each other and  
27 broadly consistent with previous fluorescence microscopy studies [21, 51], although a 3-D SIM  
28 reconstruction in one previous study showed MAVS forming rod-shaped puncta ranging from  
29 100 nm to 650 nm in length, with a median length of 350 nm (n = 74) [27]. However, 350 nm  
30 is similar to the axial resolution of SIM and hence could be an overestimate of the MAVS  
31 cluster length.

1 An 80-nm long MAVS CARD helical assembly would still contain 156 MAVS molecules, a  
2 sufficiently large number to retain potential for polymerization-dependent signal amplification  
3 and to function as a mitochondrial signaling platform capable of recruiting the necessary  
4 number and diversity of downstream signaling proteins to elicit a robust IFN- $\beta$  response [19,  
5 20]. Given the smaller than expected size of MAVS signaling assemblies, a maximal MAVS-  
6 dependent signaling response may require a larger number of fibril nucleation events than  
7 previously thought. However, these nucleation events need not be independent, and MAVS  
8 signaling complexes may nevertheless assemble cooperatively, with assembled complexes  
9 promoting the nucleation of additional complexes without MAVS CARD filament extension  
10 beyond approximately 80 nm, but potentially forming two- or three-dimensional networks of  
11 microfibrils. Such a trade-off of reduced filament length in favor of increased nucleation was  
12 recently shown to occur elsewhere in the dsRNA sensing pathway. Indeed, LGP2 increases the  
13 initial rate of MDA5-dsRNA binding and limits MDA5 filament assembly, resulting in the  
14 formation of more numerous, shorter MDA5 filaments to generate a greater signaling activity  
15 [14]. Imaging at higher resolution, for example by electron microscopy, is required to elucidate  
16 the structural organization of MAVS signaling complexes.

17 We have shown that the MAVS transmembrane anchor is required for MAVS-associated  
18 mitochondrial remodeling and confirmed that the TM is required for MAVS-dependent IFN- $\beta$   
19 signaling and apoptosis in live cells and under the same experimental conditions used for the  
20 super-resolution imaging experiments in this study. The diffuse cytosolic localization of  
21 MAVS- $\Delta$ TM suggests that MAVS oligomerization is regulated by elements between the  
22 CARD and TM, and that the TM is required to overcome this regulation. It is tempting to  
23 speculate that the physical constraints imposed by MAVS aggregation and association with  
24 RLR-RNA complexes exert a physical force on the outer mitochondrial membrane capable of  
25 inducing distortions that could conceivably contribute to mitochondrial remodeling or leakage  
26 associated with apoptotic cell death.

## 27 **Materials and methods**

28 **Expression plasmids.** Genes encoding full-length mouse MAVS (residues 1-503, Uniprot  
29 entry Q8VCF0) and mouse MAVS with the transmembrane anchor (residues 479-503) deleted  
30 (MAVS- $\Delta$ TM) were cloned into the pCMV-SPORT6 vector (BioCat, Heidelberg, Germany).

31 **Cell culture.** Wild-type mouse embryonic fibroblasts (MEFs), MAVS knockout (MAVS KO)  
32 MEFs, STING KO MEFs and 3T3 cells were cultured in Dulbecco's modified Eagle Medium

1 high glucose (DMEM) (Gibco, Waltham, MA), supplemented with 10% v/v fetal bovine serum  
2 and 10% sodium pyruvate (Gibco). Cells were maintained at 37°C in a 5% CO<sub>2</sub> atmosphere.

3 **Transfections.** Transient transfections were performed with the Neon transfection system  
4 (ThermoFisher, Waltham, MA) following the manufacturer's protocol. For transfections in 6-  
5 well plates, the cells were transfected at a density of 2.5 x 10<sup>5</sup> cells per well using a 10 µl Neon  
6 Tip and a total of 0.5 µg of nucleic acids per well. For transfections in 96-well plates, cells  
7 were transfected and seeded at 8.5 x 10<sup>4</sup> cells per well using a 10 µl Neon Tip and a total of 0.1  
8 µg of nucleic acids per well. For MAVS KO MEFs transfected with MAVS the transfected  
9 nucleic acids consisted of 1:1 (w/w) pCMV-MAVS plasmid DNA:poly(I:C) RNA (Midland  
10 Certified Reagents), or 1:1 (w/w) pCMV-MAVS plasmid DNA:pCMV empty vector plasmid  
11 DNA for the untreated control. The total amount of poly(I:C) RNA was 0.6 – 1 ng per 1,000  
12 cells. For the MAVS KO MEF negative control and the experiments with wild-type MEFs and  
13 endogenous MAVS (Fig. 1B, 3) the transfected nucleic acids consisted of 1:1 (w/w) pCMV  
14 empty vector plasmid DNA:poly(I:C) RNA, or pCMV empty vector plasmid DNA only for the  
15 untreated control.

16 **West Nile Virus infection.** West Nile reporter virus particles were generated in HEK 293T  
17 cells by cotransfecting the cells with plasmids encoding the structural proteins (C, prM, E) and  
18 a subgenomic replicon containing GFP (pWNVII-Rep-G-Z), as described previously [52, 53].  
19 The plasmids were kind gifts from Theodore Pierson (NIH). Supernatant collected 48 h after  
20 transfection was filtered through 0.2 µm membranes and used to infect 3T3 cells. 24 h post-  
21 infection, the cells were fixed with 4% formaldehyde solution and labeled for  
22 immunofluorescence.

23 **Immunofluorescence staining.** For anti-MAVS staining cells were fixed 16 h post-  
24 transfection on the microscopy coverslips with 4% formaldehyde in phosphate-buffered saline  
25 (PBS), permeabilized in 50 mM Tris/HCl pH 7.5, 0.15 M NaCl, 0.02% Saponin (TBSS) for 30  
26 min at 37°C, and then blocked in 5% BSA in TBSS for 1 h at 37°C. Cells were stained with a  
27 mouse anti-MAVS monoclonal IgG2a antibody (MAVS (C-1), Santa Cruz Biotechnology,  
28 Dallas, TX) in TBSS at 1:80 dilution for 1.5 h at 37°C. After four 5-min washes with TBSS,  
29 the cells were incubated with goat anti-mouse IgG conjugated to Alexa Fluor 488 (Molecular  
30 Probes, Eugene, OR) at 1:80 dilution for 1 h at room temperature, washed with TBSS, and  
31 mounted for imaging with ProLong Gold Antifade Mountant with DAPI (ThermoFisher). For  
32 anti-TOM20 staining cells were fixed and blocked the same way as for anti-MAVS staining.  
33 TOM20 was stained with rabbit anti-TOM20 polyclonal IgG antibody (TOM20 (FL-145),

1 Santa Cruz Biotechnology) in TBSS at 1:80 dilution for 1.5 h at 37°C. After washing with  
2 TBSS, the cells were incubated with goat anti-rabbit IgG conjugated to Alexa Fluor 555  
3 (Molecular Probes) at 1:80 dilution for 1 h at room temperature, washed with TBSS, and  
4 mounted for imaging with ProLong Gold Antifade Mountant with DAPI (ThermoFisher). For  
5 the MAVS costaining with IRF-3 and MDA5 cells were fixed, permeabilized, and blocked as  
6 for anti-MAVS staining above. IRF-3 and MDA5 were stained with rabbit anti-IRF3 polyclonal  
7 IgG (IRF-3 (FL-425), Santa Cruz Biotechnology) and rabbit anti-MDA5 polyclonal IgG (Enzo  
8 Life Sciences, Farmingdale, NY), respectively, at 1:80 dilution in TBSS for 1.5 h at 37°C. After  
9 washing with TBSS, the cells were incubated with goat anti-rabbit antibody conjugated to  
10 Alexa Fluor 647 (Molecular Probes) at 1:80 dilution for 1 h at room temperature, and then  
11 mounted for imaging with ProLong Gold Antifade Mountant with DAPI (ThermoFisher).

12 **Mitochondrial remodeling analysis.** Widefield images were acquired at 100x magnification  
13 with an inverted Nikon TE2000 microscope equipped with a Niji LED illumination (Bluebox  
14 Optics, Huntingdon, UK), a 100x/1.49NA oil objective (Nikon, Tokyo, Japan) and NEO  
15 sCMOS camera (Andor, Belfast, UK). A custom ImageJ macro script  
16 (Mitochondria\_remodelling\_analysis.ijm in Supplementary Data) was written to analyze  
17 mitochondrial distance, area and length parameters with ImageJ [54]. More specifically,  
18 distance from the nucleus was measured as the shortest distance from each TOM20  
19 fluorescence pixel to a DAPI fluorescence pixel. Second, the fraction of the cytosolic area  
20 occupied by mitochondria was measured in each cell. Third, the length of mitochondrial  
21 compartments was measured by skeletonizing the mitochondrial fluorescence signal,  
22 segmenting the skeleton at branchpoints and measuring the length of each resulting segment.  
23 These measurements were performed on 28 cells without poly(I:C) and 11 cells with poly(I:C)  
24 treatment.

25 **MAVS-MDA5 interaction analysis.** The averaged distances of the collective points in the  
26 MDA5 and MAVS fluorescence signals after treatment with poly(I:C) or a control plasmid was  
27 calculated with the Interaction analysis plugin for ImageJ from MosaicSuite (MOSAIC Group,  
28 Dresden, Germany) [35]. Colocalization was measured by calculating the Pearson correlation  
29 coefficient with the Coloc 2 plugin in ImageJ.

30 **Confocal fluorescence imaging.** Confocal imaging (Figs. 1B, 1D, 2, 3) was carried out on a  
31 Zeiss (Oberkochen, Germany) LSM 780 or Leica (Wetzlar, Germany) TCS SP8 laser scanning  
32 inverted microscope with a 40x/1.3 NA or 63x/1.4 NA oil immersion objective lens. The Zeiss  
33 was equipped with diode 405 nm, Argon multiline, DPSS 561 nm and HeNe 633 nm laser lines.

1 The Leica was equipped with diode 405 nm and NKT Super K pulsed white light (470-670  
2 nm) lasers. On the Zeiss, DAPI/Alexa Fluor 405 (405 nm excitation), Fluorescein/ATTO488  
3 (488 nm excitation), mApple (561 nm excitation), Alexa Fluor 647/SiR-647 (633 nm  
4 excitation) and differential interference contrast (DIC) images were collected and analyzed  
5 with ZEN 2009-2011 (Zeiss) and ImageJ [54]. On the Leica, Alexa Fluor 405 (405 nm  
6 excitation), GFP/ATTO488 (488 nm excitation) and Alexa Fluor 647 (633 nm excitation)  
7 images were collected and analyzed with LAS AF (Leica). Images were deconvolved with  
8 Huygens Professional (Scientific Volume Imaging, b.v., Hilversum, The Netherlands).

9 **Structured Illumination Microscopy (SIM).** Cells were plated as a monolayer on high  
10 performance Zeiss cover glasses ( $D = 0.17$  mm, 18 x 18 mm type 1½ H, ISO 8255-1 with  
11 restricted thickness-related tolerance of  $\pm 0.005$  mm, refractive index =  $1.5255 \pm 0.0015$ ) in 6-  
12 well CytoOne TC-Treated tissue culture plates (STARLAB, Milton Keynes, UK). Images were  
13 acquired on a Zeiss ELYRA S.1 system with a pco.edge 5.5 scientific CMOS camera using a  
14 63x/1.4 NA oil immersion objective lens. For optimal lateral spatial sampling a 1.6x  
15 intermediate magnification lens was used, resulting in a pixel size of 64 nm. Excitation was  
16 achieved with a 488 nm laser and emission was filtered with a 495-550 nm band pass filter.  
17 Modulation of the illumination light was achieved using a physical grating with 28  $\mu\text{m}$  spacing.  
18 This patterned illumination was shifted through 5 phases at each of 3 rotational angles per  
19 image. Raw data were processed using ZEN software.

20 **STimulated Emission Depletion (STED) microscopy.** Cells were plated as a monolayer on  
21 high performance Zeiss cover glasses ( $D = 0.17$  mm, 18 x 18 mm type 1½ H, ISO 8255-1 with  
22 restricted thickness-related tolerance of  $\pm 0.005$  mm, refractive index =  $1.5255 \pm 0.0015$ ) in 6-  
23 well CytoOne TC-Treated tissue culture plates (STARLAB). Images were acquired on a Leica  
24 TCS SP8 STED confocal system with time-gated HyD GaAsP detectors using a 100x/1.4 NA  
25 oil immersion objective lens. Excitation was achieved with a NKT Super K pulsed white light  
26 (470 – 670 nm) laser tuned to 488 nm and STED was induced with a 592 nm laser ( $\sim 40$  MW  
27  $\text{cm}^{-2}$ ). A time gate window of 2 – 6 ns was used to maximize STED resolution. 20 nm pixels  
28 were used to ensure adequate spatial sampling to support maximal expected resolution. Images  
29 were deconvolved with Huygens Professional.

30 **Stochastic Optical Reconstruction Microscopy (STORM).** In STORM, fluorophores are  
31 induced to switch, or “blink” between fluorescent and dark states. With a sufficiently small  
32 fraction of fluorophores in the fluorescent state at any given time, spatial overlap between  
33 adjacent fluorophores is avoided and the positions of individual fluorophores can be

1 determined with high precision using the point-spread function of each fluorophore [38].  
2 STORM images are generated by plotting the positions of each fluorophore blinking event as  
3 points in the image plane and applying to each point a blurring factor corresponding to the  
4 localization precision for that point. The appearance of the images also depends on the  
5 efficiency of fluorescent labeling and the extent of fluorophore bleaching during the  
6 experiment.

7 Cells were plated as a monolayer on high performance CellPath (Newtown, UK) HiQA  
8 Coverslips (No. 1.5 H, 24 mm Ø) in 6-well CytoOne TC-Treated tissue culture plates. Alexa  
9 Fluor 647-labeled samples were imaged in the following buffer condition: 10% w/v glucose,  
10 0.5 mg ml<sup>-1</sup> glucose oxidase (Sigma-Aldrich, St. Louis, MO), 40 µg ml<sup>-1</sup> catalase (Sigma  
11 Aldrich), and 0.1 M β-mercaptoethylamine (MEA) (Sigma-Aldrich) in PBS, pH adjusted to 7.4  
12 with concentrated HCl. To minimize air oxidation of the fluorophore, the imaging well was  
13 filled to full capacity with the imaging buffer and sealed with a cover glass. Imaging was  
14 performed with an N-STORM microscope (Nikon) equipped with an Apochromat TIRF  
15 100x/1.49 NA oil immersion objective lens, a single photon detection iXon Ultra DU897  
16 EMCCD camera (Andor), and 405 nm (30 mW) and 647 nm (170 mW) laser lines. To acquire  
17 single-molecule localizations, samples were constantly illuminated with the 647 nm laser at 2-  
18 3 kW cm<sup>-2</sup>. To maintain adequate localization density, the 405 nm laser was used to reactivate  
19 the fluorophore. During imaging, Perfect Focus System was used to maintain the axial focal  
20 plane. 7 – 10 x 10<sup>4</sup> frames were collected for each field of view at a frame rate of 50-70 Hz.  
21 STORM images were reconstructed with NIS Elements Advanced Research (Nikon): lateral  
22 drift correction was performed using automated cross-correlation between frame sets and each  
23 localization point in the reconstructed image was shown as a normalized Gaussian, the width  
24 of which corresponded to the localization uncertainty calculated using the Thompson-Larson-  
25 Webb equation [55]. Each STORM image contained 1-2 million molecules within a single cell.

26 **Fourier ring correlation (FRC).** The effective optical resolution of the STORM images was  
27 assessed using the FRC method proposed by Nieuwenhuizen *et al.* (2013) using the Matlab  
28 code provided [39] (frc\_analysis.m in Supplementary Data). An FRC threshold of 1/7 (0.143)  
29 was used to determine the resolution of each rendered STORM image.

30 **Cluster analysis of MAVS immunofluorescence in STORM images.** Cluster analysis was  
31 performed to assess the size of fluorescent foci from immunolabeled MAVS in the STORM  
32 images. Using a custom C++ script (nestedclusteranalysis.cpp in Supplementary Data), each  
33 image was divided into 3 x 3 µm windows covering the field of view and windows with a mean

1 fluorescence intensity greater than an arbitrary threshold—half of the mean fluorescence  
2 intensity of the whole image—were selected for analysis (Fig. 5C-E). Cluster analysis was  
3 performed by fitted a hierarchical nested cluster model, or clusters of clusters model, to the pair  
4 correlation function (or radial distribution function), defined as the average number of points  
5 located in a ring of radius  $r$  centered around each point and normalized by the expected intensity  
6 taking into account the border of the window of analysis [44, 56]. The nested cluster model  
7 was fitted to the pair correlation curve using a least squares approach. The selected model  
8 comprised two clusters (smaller “inner” clusters that cluster into larger “outer” clusters)  
9 defined by four parameters ( $\mu_1, \sigma_1, \mu_2, \sigma_2$ ) through the following equation:

$$10 \quad g_{\text{nested}}(r) = 1 + \frac{1}{4\pi\sigma_2^2\mu_2} e^{-\frac{1}{4\pi\sigma_2^2}r^2} + \frac{1}{4\pi(\sigma_1^2 + \sigma_2^2)\mu_1} e^{-\frac{1}{4\pi(\sigma_1^2 + \sigma_2^2)}r^2}$$

11 with  $\sigma_1$  and  $\sigma_2$  corresponding to the outer and inner cluster sizes, respectively.

12 **Simulated rendering of immunolabeled MAVS fibrils.** The atomic coordinates of an mouse  
13 antibody molecule (PDB code 1IGY) [57] were manually docked with UCSF Chimera [58] to  
14 an arbitrary epitope on the MAVS CARD coordinates (PDB code 3J6J) to simulate a primary  
15 antibody-MAVS complex. Two additional antibody molecules were then docked to two  
16 different arbitrary epitopes in the constant region (Fc domain) of the primary antibody. The  
17 helical symmetry of the MAVS CARD filament determined by cryo-electron microscopy  
18 (cryoEM) image reconstruction [19] was then applied consecutively to the atomic coordinate  
19 of the complex to generate a 200 nm MAVS CARD filament with bound primary and  
20 secondary antibodies. The simulated epitopes and orientations of the antibodies were selected  
21 to minimize steric clashes after the helical symmetry of the MAVS CARD filament was  
22 applied. A custom C++ code was used to render the atoms of the lysine residues, the sites of  
23 fluorophore conjugation, of each secondary antibody in the filament. Each atom was rendered  
24 on a two-dimensional image at a 5 nm scale with a given observation probability ranging from  
25 20% to 100%, in order to emulate different antibody labeling efficiencies. The resulting image  
26 was then blurred in order to take into account the localization uncertainty of the STORM single-  
27 molecule localizations events, approximately 10 nm.

28 **Dual-luciferase reporter cell signaling assay.** MAVS KO MEFs or STING KO MEFs were  
29 transfected with wild-type MAVS or MAVS- $\Delta$ TM and poly(I:C) with the Neon transfection  
30 system as described above, using the same conditions as for light microscopy, except that  
31 plasmids encoding firefly luciferase under an interferon- $\beta$  (IFN- $\beta$ ) promoter and *Renilla*

1 luciferase under a constitutive promoter (Promega, Madison, WI) were also included in the  
2 transfection. Cells were transfected and seeded in quadruplet sets for each condition in 96-well  
3 clear bottom black polystyrene microplates (Corning, Corning, NY) at  $5 - 6 \times 10^3$  cells per  
4 well. Cells were lysed and the lysates transferred to all-white 96-well flat solid bottom plates  
5 suitable for tissue culture and luminescence measurements (Greiner Bio-One, Kremsmünster,  
6 Austria). Sample preparation from cell lysates and luciferase luminescence measurement were  
7 performed according to the manufacturer's protocol for the Dual-Luciferase Reporter Assay  
8 System (Promega). IFN- $\beta$ -dependent induction of firefly luciferase was measured in cell  
9 lysates 16 h post-induction with a PHERAstar (Ortenberg, Germany) FSX microplate reader  
10 with dual sample injection. IFN- $\beta$  signaling activity was measured as the ratio of firefly  
11 luciferase luminescence to *Renilla* luciferase luminescence.

12 **Quantification of cell death.** Depolarization of the inner mitochondrial membrane was  
13 quantified by staining cells with 40 nM of 3,3'-dihexyloxacarbocanine iodide (DiOC6, Sigma-  
14 Aldrich) or 6 mg ml<sup>-1</sup> propidium iodide (PI) for 1.5 h in PBS. DiOC6 and PI fluorescence was  
15 quantified by flow cytometry. Quantification was set at 5,000 for cell count and FL1 (530 nm)  
16 and FL3 (670 nm) were used to acquire DiOC6 and PI signals, respectively. Data were acquired  
17 on a LSR II flow cytometer (BD Biosciences, San Jose, CA) and analyzed with FlowJo  
18 (TreeStar, Ashland, OR).

19 **Statistical analysis.** No statistical methods were used to predetermine sample size,  
20 experiments were not randomized, and the investigators were not blinded to experimental  
21 outcomes. Unless otherwise noted, errors are presented as the standard deviation of the mean  
22 of four replicates conducted in a single independent experiment. Statistical significance was  
23 calculated with Prism 8 (GraphPad Software, San Diego, CA) using an unpaired t-test without  
24 prior assumptions regarding the standard deviations of each set of quadruplet measurement.  
25 Statistical significance was assigned as follows: \*,  $P < 0.05$ ; \*\*,  $P < 0.01$ ; \*\*\*,  $P < 0.001$ ,  $n =$   
26 4.

27 **Author contributions.** Conceptualization, M.-S.H. and Y.M.; Methodology, all authors;  
28 Software, J.B. and L.M.; Formal Analysis, J.B., M.P., L.M.; Investigation, M.-S.H., J.B., J.H.,  
29 A.A., M.P.; Writing – Original Draft, M.-S.H. and Y.M.; Writing – Review & Editing, Y.M.,  
30 with input from all authors; Visualization, M.-S.H., J.B., J.H., A.A., M.P. and Y.M.;  
31 Supervision, Y.M.; Project Administration, Y.M.; Funding Acquisition, Y.M.

32 **Conflict of Interest.** The authors declare no conflict of interest.



1 **Acknowledgements.** We thank Theodore Pierson (NIH) for his kind gift of plasmids encoding  
2 the West Nile reporter virus. We thank Michael Gale Jr. (Univ. of Washington) and Jan  
3 Rehwinkel (Univ. of Oxford) for their kind gifts of MAVS KO MEFs and STING KO MEFs,  
4 respectively. We thank Nick Barry and Ben Sutcliffe at the MRC-LMB Light Microscopy  
5 Facility for support with the collection and handling of light microscopy data. We thank Yangci  
6 Liu and Clare Bryant for their comments on the manuscript, and all members of the Modis lab  
7 for insightful discussions. This work was supported by a Wellcome Trust Senior Research  
8 Fellowship to Y.M. (101908/Z/13/Z).

## 9 **References**

- 10 1. Lassig, C. & Hopfner, K. P. (2017) Discrimination of cytosolic self and non-self RNA by  
11 RIG-I-like receptors, *J Biol Chem.* **292**, 9000-9009.
- 12 2. Chung, H., Calis, J. J. A., Wu, X., Sun, T., Yu, Y., Sarbanes, S. L., Dao Thi, V. L.,  
13 Shilvock, A. R., Hoffmann, H. H., Rosenberg, B. R. & Rice, C. M. (2018) Human ADAR1  
14 Prevents Endogenous RNA from Triggering Translational Shutdown, *Cell.* **172**, 811-824  
15 e14.
- 16 3. Ahmad, S., Mu, X., Yang, F., Greenwald, E., Park, J. W., Jacob, E., Zhang, C. Z. & Hur,  
17 S. (2018) Breaching Self-Tolerance to Alu Duplex RNA Underlies MDA5-Mediated  
18 Inflammation, *Cell.* **172**, 797-810 e13.
- 19 4. Yoneyama, M., Onomoto, K., Jogi, M., Akaboshi, T. & Fujita, T. (2015) Viral RNA  
20 detection by RIG-I-like receptors, *Curr Opin Immunol.* **32**, 48-53.
- 21 5. Seth, R. B., Sun, L., Ea, C. K. & Chen, Z. J. (2005) Identification and characterization of  
22 MAVS, a mitochondrial antiviral signaling protein that activates NF-kappaB and IRF 3,  
23 *Cell.* **122**, 669-82.
- 24 6. Kawai, T., Takahashi, K., Sato, S., Coban, C., Kumar, H., Kato, H., Ishii, K. J., Takeuchi,  
25 O. & Akira, S. (2005) IPS-1, an adaptor triggering RIG-I- and Mda5-mediated type I  
26 interferon induction, *Nat Immunol.* **6**, 981-8.
- 27 7. Xu, L. G., Wang, Y. Y., Han, K. J., Li, L. Y., Zhai, Z. & Shu, H. B. (2005) VISA is an  
28 adapter protein required for virus-triggered IFN-beta signaling, *Mol Cell.* **19**, 727-40.
- 29 8. Meylan, E., Curran, J., Hofmann, K., Moradpour, D., Binder, M., Bartenschlager, R. &  
30 Tschoopp, J. (2005) Cardif is an adaptor protein in the RIG-I antiviral pathway and is  
31 targeted by hepatitis C virus, *Nature.* **437**, 1167-72.
- 32 9. Hornung, V., Ellegast, J., Kim, S., Brzozka, K., Jung, A., Kato, H., Poeck, H., Akira, S.,  
33 Conzelmann, K. K., Schlee, M., Endres, S. & Hartmann, G. (2006) 5'-Triphosphate RNA  
34 Is the Ligand for RIG-I, *Science.* **314**, 994-997.

- 1 10. Pichlmair, A., Schulz, O., Tan, C. P., Naslund, T. I., Liljestrom, P., Weber, F. & Reis, E.  
2 S. C. (2006) RIG-I-Mediated Antiviral Responses to Single-Stranded RNA Bearing 5'  
3 Phosphates, *Science*. **314**, 997-1001.
- 4 11. Kato, H., Takeuchi, O., Sato, S., Yoneyama, M., Yamamoto, M., Matsui, K., Uematsu, S.,  
5 Jung, A., Kawai, T., Ishii, K. J., Yamaguchi, O., Otsu, K., Tsujimura, T., Koh, C. S., Reis  
6 e Sousa, C., Matsuura, Y., Fujita, T. & Akira, S. (2006) Differential roles of MDA5 and  
7 RIG-I helicases in the recognition of RNA viruses, *Nature*. **441**, 101-5.
- 8 12. Devarkar, S. C., Wang, C., Miller, M. T., Ramanathan, A., Jiang, F., Khan, A. G., Patel,  
9 S. S. & Marcotrigiano, J. (2016) Structural basis for m7G recognition and 2'-O-methyl  
10 discrimination in capped RNAs by the innate immune receptor RIG-I, *Proc Natl Acad Sci*  
11 *U S A*. **113**, 596-601.
- 12 13. Kato, H., Takeuchi, O., Mikamo-Satoh, E., Hirai, R., Kawai, T., Matsushita, K., Hiiragi,  
13 A., Dermody, T. S., Fujita, T. & Akira, S. (2008) Length-dependent recognition of double-  
14 stranded ribonucleic acids by retinoic acid-inducible gene-I and melanoma differentiation-  
15 associated gene 5, *J Exp Med*. **205**, 1601-10.
- 16 14. Bruns, A. M., Leser, G. P., Lamb, R. A. & Horvath, C. M. (2014) The innate immune  
17 sensor LGP2 activates antiviral signaling by regulating MDA5-RNA interaction and  
18 filament assembly, *Mol Cell*. **55**, 771-81.
- 19 15. Uchikawa, E., Lethier, M., Malet, H., Brunel, J., Gerlier, D. & Cusack, S. (2016) Structural  
20 Analysis of dsRNA Binding to Anti-viral Pattern Recognition Receptors LGP2 and  
21 MDA5, *Mol Cell*. **62**, 586-602.
- 22 16. Berke, I. C. & Modis, Y. (2012) MDA5 cooperatively forms dimers and ATP-sensitive  
23 filaments upon binding double-stranded RNA, *EMBO J*. **31**, 1714-26.
- 24 17. Peisley, A., Lin, C., Wu, B., Orme-Johnson, M., Liu, M., Walz, T. & Hur, S. (2011)  
25 Cooperative assembly and dynamic disassembly of MDA5 filaments for viral dsRNA  
26 recognition, *Proc Natl Acad Sci U S A*. **108**, 21010-21015.
- 27 18. Wu, B., Peisley, A., Richards, C., Yao, H., Zeng, X., Lin, C., Chu, F., Walz, T. & Hur, S.  
28 (2013) Structural basis for dsRNA recognition, filament formation, and antiviral signal  
29 activation by MDA5, *Cell*. **152**, 276-89.
- 30 19. Wu, B., Peisley, A., Tetrault, D., Li, Z., Egelman, E. H., Magor, K. E., Walz, T., Penczek,  
31 P. A. & Hur, S. (2014) Molecular imprinting as a signal-activation mechanism of the viral  
32 RNA sensor RIG-I, *Mol Cell*. **55**, 511-23.
- 33 20. Wu, B. & Hur, S. (2015) How RIG-I like receptors activate MAVS, *Curr Opin Virol*. **12**,  
34 91-8.

- 1 21. Hou, F., Sun, L., Zheng, H., Skaug, B., Jiang, Q. X. & Chen, Z. J. (2011) MAVS forms  
2 functional prion-like aggregates to activate and propagate antiviral innate immune  
3 response, *Cell*. **146**, 448-61.
- 4 22. Horner, S. M., Liu, H. M., Park, H. S., Briley, J. & Gale, M., Jr. (2011) Mitochondrial-  
5 associated endoplasmic reticulum membranes (MAM) form innate immune synapses and  
6 are targeted by hepatitis C virus, *Proc Natl Acad Sci U S A*. **108**, 14590-5.
- 7 23. Dixit, E., Boulant, S., Zhang, Y., Lee, A. S., Odendall, C., Shum, B., Hacohen, N., Chen,  
8 Z. J., Whelan, S. P., Fransen, M., Nibert, M. L., Superti-Furga, G. & Kagan, J. C. (2010)  
9 Peroxisomes are signaling platforms for antiviral innate immunity, *Cell*. **141**, 668-81.
- 10 24. Lei, Y., Moore, C. B., Liesman, R. M., O'Connor, B. P., Bergstralh, D. T., Chen, Z. J.,  
11 Pickles, R. J. & Ting, J. P. (2009) MAVS-mediated apoptosis and its inhibition by viral  
12 proteins, *PLoS One*. **4**, e5466.
- 13 25. Brubaker, S. W., Gauthier, A. E., Mills, E. W., Ingolia, N. T. & Kagan, J. C. (2014) A  
14 bicistronic MAVS transcript highlights a class of truncated variants in antiviral immunity,  
15 *Cell*. **156**, 800-11.
- 16 26. Pothlichet, J., Niewold, T. B., Vitour, D., Solhonne, B., Crow, M. K. & Si-Tahar, M.  
17 (2011) A loss-of-function variant of the antiviral molecule MAVS is associated with a  
18 subset of systemic lupus patients, *EMBO Mol Med*. **3**, 142-52.
- 19 27. Xu, H., He, X., Zheng, H., Huang, L. J., Hou, F., Yu, Z., de la Cruz, M. J., Borkowski, B.,  
20 Zhang, X., Chen, Z. J. & Jiang, Q. X. (2014) Structural basis for the prion-like MAVS  
21 filaments in antiviral innate immunity, *eLife*. **3**, e01489.
- 22 28. Li, X. D., Sun, L., Seth, R. B., Pineda, G. & Chen, Z. J. (2005) Hepatitis C virus protease  
23 NS3/4A cleaves mitochondrial antiviral signaling protein off the mitochondria to evade  
24 innate immunity, *Proc Natl Acad Sci U S A*. **102**, 17717-22.
- 25 29. Lin, R., Lacoste, J., Nakhaei, P., Sun, Q., Yang, L., Paz, S., Wilkinson, P., Julkunen, I.,  
26 Vitour, D., Meurs, E. & Hiscott, J. (2006) Dissociation of a MAVS/IPS-1/VISA/Cardif-  
27 IKKepsilon molecular complex from the mitochondrial outer membrane by hepatitis C  
28 virus NS3-4A proteolytic cleavage, *J Virol*. **80**, 6072-83.
- 29 30. Ferreira, A. R., Magalhaes, A. C., Camoes, F., Gouveia, A., Vieira, M., Kagan, J. C. &  
30 Ribeiro, D. (2016) Hepatitis C virus NS3-4A inhibits the peroxisomal MAVS-dependent  
31 antiviral signalling response, *J Cell Mol Med*. **20**, 750-7.
- 32 31. Dong, J., Xu, S., Wang, J., Luo, R., Wang, D., Xiao, S., Fang, L., Chen, H. & Jiang, Y.  
33 (2015) Porcine reproductive and respiratory syndrome virus 3C protease cleaves the  
34 mitochondrial antiviral signalling complex to antagonize IFN-beta expression, *J Gen  
35 Virol*. **96**, 3049-58.

- 1 32. Shi, Y., Yuan, B., Qi, N., Zhu, W., Su, J., Li, X., Qi, P., Zhang, D. & Hou, F. (2015) An  
2 autoinhibitory mechanism modulates MAVS activity in antiviral innate immune response,  
3 *Nat Commun.* **6**, 7811.
- 4 33. Zeng, W., Sun, L., Jiang, X., Chen, X., Hou, F., Adhikari, A., Xu, M. & Chen, Z. J. (2010)  
5 Reconstitution of the RIG-I pathway reveals a signaling role of unanchored polyubiquitin  
6 chains in innate immunity, *Cell.* **141**, 315-30.
- 7 34. Suthar, M. S., Ramos, H. J., Brassil, M. M., Netland, J., Chappell, C. P., Blahnik, G.,  
8 McMillan, A., Diamond, M. S., Clark, E. A., Bevan, M. J. & Gale, M., Jr. (2012) The RIG-  
9 I-like receptor LGP2 controls CD8(+) T cell survival and fitness, *Immunity.* **37**, 235-48.
- 10 35. Helmuth, J. A., Paul, G. & Sbalzarini, I. F. (2010) Beyond co-localization: inferring spatial  
11 interactions between sub-cellular structures from microscopy images, *BMC*  
12 *Bioinformatics.* **11**, 372.
- 13 36. Sanchez-Aparicio, M. T., Ayllon, J., Leo-Macias, A., Wolff, T. & Garcia-Sastre, A. (2017)  
14 Subcellular Localizations of RIG-I, TRIM25, and MAVS Complexes, *J Virol.* **91**.
- 15 37. Perkins, G., Bossy-Wetzel, E. & Ellisman, M. H. (2009) New insights into mitochondrial  
16 structure during cell death, *Exp Neurol.* **218**, 183-92.
- 17 38. Huang, B., Jones, S. A., Brandenburg, B. & Zhuang, X. (2008) Whole-cell 3D STORM  
18 reveals interactions between cellular structures with nanometer-scale resolution, *Nat*  
19 *Methods.* **5**, 1047-52.
- 20 39. Nieuwenhuizen, R. P., Lidke, K. A., Bates, M., Puig, D. L., Grunwald, D., Stallinga, S. &  
21 Rieger, B. (2013) Measuring image resolution in optical nanoscopy, *Nat Methods.* **10**, 557-  
22 62.
- 23 40. Saxton, W. O. & Baumeister, W. (1982) The correlation averaging of a regularly arranged  
24 bacterial cell envelope protein, *J Microsc.* **127**, 127-38.
- 25 41. Unser, M., Trus, B. L. & Steven, A. C. (1987) A new resolution criterion based on spectral  
26 signal-to-noise ratios, *Ultramicroscopy.* **23**, 39-51.
- 27 42. Rosenthal, P. B. & Henderson, R. (2003) Optimal determination of particle orientation,  
28 absolute hand, and contrast loss in single-particle electron cryomicroscopy, *J Mol Biol.*  
29 **333**, 721-45.
- 30 43. Illian, J., Penttinen, A., Stoyan, H. & Stoyan, D. (2007) *Statistical Analysis and Modelling*  
31 *of Spatial Point Patterns*, John Wiley & Sons, Ltd, Chichester, UK.
- 32 44. Sengupta, P., Jovanovic-Talisman, T., Skoko, D., Renz, M., Veatch, S. L. & Lippincott-  
33 Schwartz, J. (2011) Probing protein heterogeneity in the plasma membrane using PALM  
34 and pair correlation analysis, *Nat Methods.* **8**, 969-75.

- 1 45. Laine, R. F., Albecka, A., van de Linde, S., Rees, E. J., Crump, C. M. & Kaminski, C. F.  
2 (2015) Structural analysis of herpes simplex virus by optical super-resolution imaging, *Nat*  
3 *Commun.* **6**, 5980.
- 4 46. Zamorano Cuervo, N., Osseman, Q. & Grandvaux, N. (2018) Virus Infection Triggers  
5 MAVS Polymers of Distinct Molecular Weight, *Viruses.* **10**.
- 6 47. Chen, Q., Sun, L. & Chen, Z. J. (2016) Regulation and function of the cGAS-STING  
7 pathway of cytosolic DNA sensing, *Nat Immunol.* **17**, 1142-9.
- 8 48. Sun, L., Wu, J., Du, F., Chen, X. & Chen, Z. J. (2013) Cyclic GMP-AMP synthase is a  
9 cytosolic DNA sensor that activates the type I interferon pathway, *Science.* **339**, 786-91.
- 10 49. Rottenberg, H. & Wu, S. (1998) Quantitative assay by flow cytometry of the mitochondrial  
11 membrane potential in intact cells, *Biochim Biophys Acta.* **1404**, 393-404.
- 12 50. Riccardi, C. & Nicoletti, I. (2006) Analysis of apoptosis by propidium iodide staining and  
13 flow cytometry, *Nat Protoc.* **1**, 1458-61.
- 14 51. Baril, M., Racine, M. E., Penin, F. & Lamarre, D. (2009) MAVS dimer is a crucial  
15 signaling component of innate immunity and the target of hepatitis C virus NS3/4A  
16 protease, *J Virol.* **83**, 1299-311.
- 17 52. Ansarah-Sobrinho, C., Nelson, S., Jost, C. A., Whitehead, S. S. & Pierson, T. C. (2008)  
18 Temperature-dependent production of pseudoinfectious dengue reporter virus particles by  
19 complementation, *Virology.* **381**, 67-74.
- 20 53. Pierson, T. C., Sanchez, M. D., Puffer, B. A., Ahmed, A. A., Geiss, B. J., Valentine, L. E.,  
21 Altamura, L. A., Diamond, M. S. & Doms, R. W. (2006) A rapid and quantitative assay  
22 for measuring antibody-mediated neutralization of West Nile virus infection, *Virology.*  
23 **346**, 53-65.
- 24 54. Rueden, C. T., Schindelin, J., Hiner, M. C., DeZonia, B. E., Walter, A. E., Arena, E. T. &  
25 Eliceiri, K. W. (2017) ImageJ2: ImageJ for the next generation of scientific image data,  
26 *BMC Bioinformatics.* **18**, 529.
- 27 55. Thompson, R. E., Larson, D. R. & Webb, W. W. (2002) Precise nanometer localization  
28 analysis for individual fluorescent probes, *Biophys J.* **82**, 2775-83.
- 29 56. Sams, M., Silye, R., Gohring, J., Muresan, L., Schilcher, K. & Jacak, J. (2014) Spatial  
30 cluster analysis of nanoscopically mapped serotonin receptors for classification of fixed  
31 brain tissue, *J Biomed Opt.* **19**, 011021.
- 32 57. Harris, L. J., Skaletsky, E. & McPherson, A. (1998) Crystallographic structure of an intact  
33 IgG1 monoclonal antibody, *J Mol Biol.* **275**, 861-72.

- 1 58. Pettersen, E. F., Goddard, T. D., Huang, C. C., Couch, G. S., Greenblatt, D. M., Meng, E.
- 2 C. & Ferrin, T. E. (2004) UCSF Chimera--a visualization system for exploratory research
- 3 and analysis, *J Comput Chem.* **25**, 1605-12.
- 4
